# Supplementary material for: Indirect contributions of global fires to surface ozone through ozone-vegetation feedback
Source: Copernicus journal article supplement (doi:10.5194/acp-2020-1264), 2021-01-13
Supplement: Supplementary file [file acp-2020-1264-AC1-supplement.pdf]

We are grateful to the referee for his/her time and energy in providing helpful comments and guidance that have improved the manuscript. In this document, we describe how we have addressed the reviewer's comments. Referee comments are shown in black and author responses are shown in blue text.

### **Reviewer#1**

Well written paper showing vegetation feedback of fire-enhanced O<sub>3</sub> based on modelling approaches. The results are supported by showing O<sub>3</sub> vegetation feedback with and without fire. I would recommend to slightly change the Introduction so that the reader would be able to follow the text more fluently and the paragraphs will follow each other more logically.

➔ Thank you for your positive evaluations. All the questions and concerns have been carefully answered. We have adjusted the sequence of paragraphs in the Introduction section, so that the readers can follow the text more fluently.

Here are some more detailed comments:

1. line 23: fire is not a source of ozone. Please rewrite it in a manner that it produces precursors of O<sub>3</sub>. Moreover, the sentence has double meaning - it is a fire and O<sub>3</sub>, which causes damage to vegetation and reduces stomatal conductance.

*Response:* We revised this sentence to avoid confusions: "Fire is an important source of ozone (O<sub>3</sub>) precursors. The formation of surface O<sub>3</sub> can cause damages to vegetation and reduce stomatal conductance." (Lines 23-24)

2. line 70-71: here you write the same as in line 49-50.

*Response:* The original sentence "Emissions from biomass burning generate a large amount of O<sub>3</sub> precursors" on lines 70-71 has been removed in the revised paper.

3. line 79: cite the three papers here.

*Response:* We added a recent paper by Zhu et al. (2021) in the revised paper. All the

four studies have been cited as suggested. (Lines 67-68)

4. line 88-90: when the O<sub>3</sub> is enhanced, one would expect higher deposition velocity. Could you explain why in that case it is the opposite?

*Response:* Vegetation acts as a major sink through stomatal uptake of O<sub>3</sub>. Observations show that surface O<sub>3</sub> damages will decrease both plant photosynthesis and stomatal conductance. Therefore, the higher surface O<sub>3</sub> results in lower stomatal conductance, leading to smaller dry deposition velocity. Such O<sub>3</sub>-vegetation feedback has been revealed in previous studies and is further clarified as follows: “Simulations showed that surface O<sub>3</sub> could be enhanced ... through comparable effects from biogeochemical (decreased dry deposition and increased isoprene emissions) and biogeophysical (changes in meteorological variables following reduced transpiration rate) feedbacks from O<sub>3</sub>-vegetation interactions.” (Lines 70-74)

5. line 103-105: how do they influence the sources and sinks? I think they influence more sinks. Now it seems as if reduced LAI would be a source of O<sub>3</sub>, when it is just reducing sink of O<sub>3</sub>. Moreover, there is a new review about O<sub>3</sub> effect on vegetation, which you might consider to include here. 10.3390/atmos12010082

*Response:* Vegetation stomatal conductance and LAI influence dry deposition of O<sub>3</sub>. LAI also influences the emissions of BVOC, which is an important O<sub>3</sub> precursor. The new review article has been cited in lines 46-47. “Tropospheric ozone (O<sub>3</sub>) is a toxic air pollutant with detrimental effects on vegetation (Yue and Unger, 2014; Jurán et al., 2021)”

6. line 203-204: is that true? One would expect oxidation of the compounds and sedimentation of particles before reaching PBL

*Response:* We agree with your comment. Most of fire emissions and oxidations occur below the PBL. We clarified as follows: “In GC-YIBs, all biomass burning emissions occur in the atmospheric boundary layer. Such configuration might slightly overestimate regional O<sub>3</sub> formation as observations suggested ~20% of fire plumes

reached the height above the boundary layer (Val Martin et al., 2010) and consequently enhanced surface O<sub>3</sub> level at the downwind regions (Jaffe and Wigder, 2012).” (Lines 214-219)

7. line 256-258: is the mean annual or is the mean from 2005-2012, which is longer time than annual.

*Response:* It is the mean [O<sub>3</sub>] during 2005-2012. “global mean annual” has been modified as “global mean” in the revised paper. (Lines 274-275)

8. line 381: I think you just hypothesize, that it is due to reduced stomatal conductance. There is no model feedback showing this nor your measurement.

*Response:* This conclusion is not a hypothesis. First, many observations have shown that O<sub>3</sub> can cause damages to stomatal conductance (Yue et al., 2016). Second, our simulations show that O<sub>3</sub>-induced reductions in stomatal conductance result in enhanced surface O<sub>3</sub> (Fig. S3a) due to reduced dry deposition velocity (Fig. S4) (Related descriptions in Lines 326-332). Third, such O<sub>3</sub>-vegetation feedback has been revealed and supported by other modeling studies (Sadiq et al., 2017; Zhou et al., 2018; Gong et al., 2020; Zhu et al., 2021).

9. Fig 6: explain abbreviations AMZ, CAF, SAS as in Fig. 3

*Response:* We modified the figure caption as follows: “The blue, red, and green bars in (a) represent the O<sub>3</sub>-vegetation feedback in Eastern U.S. (EUS), Eastern China (ECH), Western Europe (WUR), respectively. The blue, red, and green bars in (b) represent the O<sub>3</sub>-vegetation feedback in Amazon (AMZ), Central Africa (CAF), and Southern Asia (SAS), respectively.” (Lines 718-721)

## References

Gong, C., Lei, Y., Ma, Y., et al. Ozone-vegetation feedback through dry deposition and isoprene emissions in a global chemistry-carbon-climate model. *Atmospheric Chemistry and Physics*[J]: 2020, 20: 3841-3857.

- Jaffe, D. A. and Wigder, N. L. Ozone production from wildfires: A critical review. *Atmospheric Environment*[J]: 2012, 51: 1-10.
- Juráň, S., Grace, J. and Urban, O. Temporal Changes in Ozone Concentrations and Their Impact on Vegetation. *Atmosphere*[J]: 2021, 12: 82.
- Sadiq, M., Tai, A. P. K., Lombardozzi, D., et al. Effects of ozone-vegetation coupling on surface ozone air quality via biogeochemical and meteorological feedbacks. *Atmospheric Chemistry and Physics*[J]: 2017, 17: 3055-3066.
- Val Martin, M., Logan, J. A., Kahn, R. A., et al. Smoke injection heights from fires in North America: analysis of 5 years of satellite observations. *Atmospheric Chemistry and Physics*[J]: 2010, 10: 1491-1510.
- Yue, X., Keenan, T. F., Munger, W., et al. Limited effect of ozone reductions on the 20-year photosynthesis trend at Harvard forest. *Global Change Biology*[J]: 2016, 22: 3750-3759.
- Yue, X. and Unger, N. Ozone vegetation damage effects on gross primary productivity in the United States. *Atmospheric Chemistry and Physics*[J]: 2014, 14: 9137-9153.
- Zhou, S. S., Tai, A. P. K., Sun, S. H., et al. Coupling between surface ozone and leaf area index in a chemical transport model: strength of feedback and implications for ozone air quality and vegetation health. *Atmospheric Chemistry and Physics*[J]: 2018, 18: 14133-14148.
- Zhu, J., Tai, A. P. K. and Yim, S. H. L. Effects of ozone-vegetation interactions on meteorology and air quality in China using a two-way coupled land-atmosphere model. *Atmos. Chem. Phys. Discuss. [preprint]*[J]: 2021, doi: <https://doi.org/10.5194/acp-2021-165>, 2021.
